# Supplementary material for: Safety and Performance of the Omnipod Hybrid Closed-Loop System in Adults, Adolescents, and Children with Type 1 Diabetes Over 5 Days Under Free-Living Conditions
Source: PubMed Central journal article supplement (PMC7047109; doi:10.1089/dia.2019.0286), 2020-02-21
Supplement: Supp_TableS1.pdf [file Supp_TableS1.pdf]

## Supplementary Data

SUPPLEMENTARY TABLE S1. GLYCEMIC OUTCOMES FOR PARTICIPANTS WITH ADJUSTMENTS TO PUMP SETTINGS AFTER THE FIRST 48 H OF HYBRID CLOSED-LOOP

|                             | <i>Adults (N=1)</i>      |                         | <i>Adolescents (N=6)</i> |                         | <i>Children (N=5)</i>    |                         | <i>All cohorts pooled (N=12)</i> |                         |
|-----------------------------|--------------------------|-------------------------|--------------------------|-------------------------|--------------------------|-------------------------|----------------------------------|-------------------------|
|                             | <i>Before adjustment</i> | <i>After adjustment</i> | <i>Before adjustment</i> | <i>After adjustment</i> | <i>Before adjustment</i> | <i>After adjustment</i> | <i>Before adjustment</i>         | <i>After adjustment</i> |
| Overall                     |                          |                         |                          |                         |                          |                         |                                  |                         |
| Mean glucose, mg/dL         | 154                      | 154                     | 140±22                   | 154±27                  | 171±35                   | 171±26                  | 154±30                           | 161±25                  |
| Coefficient of variation, % | 19                       | 32                      | 34                       | 33                      | 40                       | 38                      | 38                               | 36                      |
| Time in glucose range, %    |                          |                         |                          |                         |                          |                         |                                  |                         |
| <54 mg/dL                   | 0.0                      | 0.0                     | 0.4±0.5                  | 0.1±0.2                 | 0.5±0.5                  | 0.2±0.3                 | 0.4±0.5                          | 0.1±0.2                 |
| <70 mg/dL                   | 0.0                      | 1.4                     | 2.8±2.5                  | 1.7±1.6                 | 2.1±1.2                  | 1.2±1.0                 | 2.3±2.0                          | 1.4±1.3                 |
| 70–180 mg/dL                | 79.4                     | 70.1                    | 81.7±14.6                | 73.3±18.2               | 61.4±20.4                | 62.4±19.0               | 73.0±18.8                        | 68.5±17.6               |
| ≥250 mg/dL                  | 0.0                      | 5.9                     | 3.9±4.8                  | 4.5±7.0                 | 15.5±14.2                | 15.0±11.2               | 8.4±11.1                         | 9.0±9.8                 |

Data are mean ± SD.  
SD, standard deviation.
