# Supplementary material for: Safety and Performance of the Omnipod Hybrid Closed-Loop System in Adults, Adolescents, and Children with Type 1 Diabetes Over 5 Days Under Free-Living Conditions
Source: PubMed Central journal article supplement (PMC7047109; doi:10.1089/dia.2019.0286), 2020-02-21
Supplement: Supp_TableS2.pdf [file Supp_TableS2.pdf]

SUPPLEMENTARY TABLE S2. GLYCEMIC OUTCOMES DURING HYBRID CLOSED-LOOP STRATIFIED BY STANDARD THERAPY MODALITY  
(PUMP OR MULTIPLE DAILY INJECTIONS)

|                                                          | <i>Adults</i>     |                  | <i>Adolescents</i> |                  | <i>Children</i>    |                  |
|----------------------------------------------------------|-------------------|------------------|--------------------|------------------|--------------------|------------------|
|                                                          | <i>Pump</i> (n=8) | <i>MDI</i> (n=3) | <i>Pump</i> (n=7)  | <i>MDI</i> (n=3) | <i>Pump</i> (n=12) | <i>MDI</i> (n=3) |
| Percentage time in range, %                              |                   |                  |                    |                  |                    |                  |
| <54 mg/dL                                                | 0.2±0.3           | 0.2±0.3          | 0.4±0.5            | 0.2±0.2          | 0.4±0.4            | 0.2±0.0          |
| <70 mg/dL                                                | 2.0±1.4           | 1.4±1.1          | 2.7±2.0            | 2.1±2.1          | 2.2±2.1            | 2.0±0.8          |
| 70–180 mg/dL                                             | 74.7±8.5          | 71±3.7           | 79.5±11.2          | 77.8±18.3        | 66.9±13.9          | 78.4±7.3         |
| ≥250 mg/dL                                               | 3.7±4.1           | 6.7±4.6          | 3.5±5.4            | 3.5±5.1          | 10.0±9.3           | 3.0±1.9          |
| Time in HCL (%)                                          | 98.4±1.1          | 95.4±1.5         | 98.9±0.7           | 97.6±2.1         | 98.2±1.7           | 98.9±0.5         |
| Hypoglycemic events per participant per day <sup>a</sup> | 1.1               | 0.7              | 1.1                | 0.9              | 1.1                | 0.8              |

Data are mean ± SD or median [IQR].

<sup>a</sup>Capillary BG <70 mg/dL.

BG, blood glucose; HCL, hybrid closed-loop; IQR, interquartile range; MDI, multiple daily injections.
